# Supplementary material for: Genome-Wide Association Study Detects Loci Involved in Scab Susceptibility in Japanese Apricot
Source: MDPI journal article supplement (doi:10.3390/horticulturae9080872), 2023-07-31
Supplement: s1 [file s1]

Archive with 2 entries (2 files):
- horticulturae-2514582-Suppl.tables.xlsx
- horticulturae-2514582-supplementary.pdf
