# Supplementary material for: Genome-Wide Association Study Detects Loci Involved in Scab Susceptibility in Japanese Apricot
Source: MDPI journal article supplement (doi:10.3390/horticulturae9080872), 2023-07-31
Supplement: s1 [file s1 › horticulturae-2514582-Suppl.tables.xlsx]

## Sheet: Table S1
Table S1 Ratio of diseased fruits (Rt) and disease severity index (Sv) observed among 108 Japanese apricot accessions in 4 years (2016-2019).
		2016		2017		2018		2019		Sequenceb
Accession	Groupa	Rt (%)	Sv	Rt (%)	Sv	Rt (%)	Sv	Rt (%)	Sv	SRA acc. no.
85486	T	6.89655	1.14943	0	0	11.1111	1.85185	0	0	DRR212549
Akebono	O	0	0	0	0	6	1	NA	NA	DRR212492
Ankoyabai	F	0	0	0	0	35	7.83333	25.3165	6.54008	DRR212437
Aojiku	F	0	0	0	0	2	0.5	NA	NA	DRR212438
Asahitaki	O	NA	NA	NA	NA	0	0	6.06061	2.52525	DRR212493
Benichidori	O	51.4851	13.8614	NA	NA	8.75	2.08333	23	4.5	DRR212494
Benio	FS	2	0.333333	0	0	0	0	NA	NA	DRR212545
Benisashi	F	51	16.1667	33	6.33333	54	14.1667	72.7273	22.7273	DRR212439
Bungo	AM	0	0	6	1.5	15	2.83333	13	1.66667	DRR212537
Chasenbai	O	NA	NA	NA	NA	0	0	NA	NA	DRR212495
Chinamume	O	6.89655	1.43678	0	0	46	13.3333	NA	NA	DRR212496
Ellching	T	54.5455	10.6061	61	15.8333	51	17.5	60	17.6667	DRR212550
Fudono	F	14.2857	2.38095	0	0	58	19.3333	53.8462	10.8974	DRR212440
Fukuju	F	13.0435	2.89855	0	0	11	1.83333	NA	NA	DRR212441
Fushida	AM	20	4.16667	7.14286	1.19048	18	5	NA	NA	DRR212538
Garyubai	F	NA	NA	0	0	0	0	0	0	DRR212442
Gekkyuden	O	0	0	0	0	0	0	5.55556	0.925926	DRR212498
Gofukushidare	O	45.4545	11.3636	NA	NA	4	1.16667	0	0	DRR212499	DRR212569
Gojiro	F	25.9259	6.17284	0	0	8	1.33333	2.46914	0.411523	DRR212443	DRR212566
Goshoko	O	NA	NA	0	0	0	0	NA	NA	DRR212500
Gyokuei	F	21	5.5	0	0	6	1.16667	0	0	DRR212444	DRR212567
Hachiro	F	11.4286	4.04762	6	1	10	1.83333	0	0	DRR212445
Hakufunbai	T	14.2857	2.72109	13.253	2.81124	6	2	5	0.666667	DRR212551
Hakuo	FS	3	0.5	2	0.333333	0	0	NA	NA	DRR212483
Hanakami	F	NA	NA	NA	NA	2	0.333333	NA	NA	DRR212446
Hasegawashibori	O	NA	NA	NA	NA	20	3.33333	NA	NA	DRR212501
Hitoeryokugaku	O	0	0	NA	NA	0	0	NA	NA	DRR212502
Ikuyonezame	O	NA	NA	NA	NA	5.33333	0.888889	NA	NA	DRR212503
Inabungo	AM	NA	NA	NA	NA	81.25	45.3125	76	28.6667	DRR465144
Jakobai	O	NA	NA	NA	NA	65	24.6667	NA	NA	DRR212504
Jizoume	F	41	7.66667	26	5.5	60	17.1667	39	6.66667	DRR212447
JO1028-6	F	52	16.6667	51	15.8333	NA	NA	NA	NA	DRR465145
Jumbotakada	AM	NA	NA	0	0	54	10	NA	NA	DRR212539
Juro	F	0	0	0	0	1	0.166667	NA	NA	DRR212448
Kagajizo	F	18	8.5	2	0.5	9	1.5	3.75	0.416667	DRR212449
Kahoku	F	0	0	0	0	0	0	NA	NA	DRR212450
Kaidarewase	F	1	0.166667	2	0.333333	8	1.83333	NA	NA	DRR212451
Kairyouchida	F	2	0.333333	0	0	10	1.66667	NA	NA	DRR212452
Kanbaishidare	O	8.92857	1.4881	NA	NA	20	3.33333	12.6761	3.05164	DRR212506
Kanseishidare	O	4	0.666667	0	0	2	0.333333	0	0	DRR212507
Kanshikobai	AM	NA	NA	0	0	0	0	0	0	DRR212540
Kensaki	F	0	0	0	0	0	0	0	0	DRR212453
Kinko	O	2.22222	0.555556	0	0	15	3	NA	NA	DRR212508
Kinotakara	F	1	0.166667	1.92308	0.641026	44	16.3333	NA	NA	DRR212454	DRR212568
Kinugasa	FS	0	0	0	0	0	0	NA	NA	DRR212484
Kinyuji	F	NA	NA	0	0	0	0	NA	NA	DRR212455
Kodama	F	2.63158	0.438596	0	0	4	0.666667	0	0	DRR212456
Koshusaisho	FS	1	0.333333	0	0	0	0	NA	NA	DRR212485
Kotsubunanko	F	52.5253	17.3401	51	13.1667	93	52.8333	63	16	DRR212457
Koyokoume	FS	0	0	0	0	0	0	NA	NA	DRR212486
Kushino	F	0	0	0	0	3	0.5	0	0	DRR212458
Maezawakoume	FS	1	0.166667	0	0	0	0	NA	NA	DRR212487
Mangetsushidare	O	0	0	0	0	2	0.333333	NA	NA	DRR212511
Meotoshidare	O	NA	NA	NA	NA	3	0.5	NA	NA	DRR212512
Mera	O	3	0.5	0	0	0	0	NA	NA	DRR212513
Michishirube	O	24.5455	6.81818	NA	NA	0	0	0	0	DRR212514
Misato1	F	32.6923	15.0641	0	0	0	0	NA	NA	DRR212459
Morinoseki	O	46.6667	10.5556	4.7619	0.793651	19	4.83333	7.04225	1.64319	DRR212515
Naniwa	F	NA	NA	0	0	0	0	NA	NA	DRR212460
Nanko	F	70	18.8333	62	16.1667	92.9293	50.8418	85	34.6667	DRR212461
OK1	FS	0	0	0	0	NA	NA	NA	NA	DRR465146
Okinaume	O	NA	NA	0	0	22	7.83333	11	1.33333	DRR212517
Okunoume	F	0	0	0	0	8	1.33333	NA	NA	DRR212463
Omoinomama	O	NA	NA	NA	NA	0	0	NA	NA	DRR212518
Orihime	FS	0	0	0	0	0	0	NA	NA	DRR212488
Osakazuki	O	NA	NA	NA	NA	10	1.83333	0	0	DRR212519
Oshuku	F	2	0.333333	0	0	9	1.5	0	0	DRR212464
Ozaki	F	0	0	0	0	5	0.833333	NA	NA	DRR212465
PM1-1	SM	NA	NA	0	0	0	0	NA	NA	DRR212546
Purplequeen	FS	NA	NA	0	0	0	0	NA	NA	DRR212489
Rinshibai	AM	NA	NA	NA	NA	0	0	NA	NA	DRR465147
Rinshu-Fukui	F	0	0	0	0	5	0.833333	NA	NA	DRR212466
Rinshu-Nara	F	NA	NA	NA	NA	1	0.166667	NA	NA	DRR212467
Ryukyokoume	FS	50	12.5	18.1818	3.78788	66	20	NA	NA	DRR212490
Sabashiko	O	NA	NA	NA	NA	25	7.29167	NA	NA	DRR212520
Sadayuume	F	57	17.1667	27	5	80	30.5	62	22.3333	DRR212468
Sakamoto	F	0	0	2	0.333333	2	0.333333	0	0	DRR212469
Seiko	F	47	16.6667	46	10.5	NA	NA	NA	NA	DRR212470
Seiryushidare	O	0	0	0	0	20	3.5	0	0	DRR212521
Seishu	F	13	2.33333	34	7.33333	NA	NA	NA	NA	DRR465148
Seiyobai	AM	0	0	0	0	9	1.5	1	0.166667	DRR212543
Shinanokoume	FS	0	0	NA	NA	NA	NA	NA	NA	DRR212491
Shinheike	O	0	0	0	0	9	1.66667	0	0	DRR212522
Shiratama	F	30.2326	8.52713	10	2.16667	53	13.1667	NA	NA	DRR212471
Shirokaga	F	50	14.6667	0	0	7	1.16667	NA	NA	DRR212472
Shisen	F	60	23.3333	0	0	11	1.83333	NA	NA	DRR212473
ST	T	0	0	10	1.66667	9	2.16667	5	1	DRR212552
Suishinbai	O	0	0	0	0	0	0	0	0	DRR212524
Sumomoume	SM	3	0.5	0	0	81.8182	29.4372	87	21.3333	DRR212547
Tagonotsuki	O	NA	NA	0	0	5.76923	0.961538	0	0	DRR212525
Taihei	AM	2.35294	0.392157	3	0.666667	8	1.83333	NA	NA	DRR212544
Taiwan	T	NA	NA	0	0	2	0.333333	0	0	DRR212553	DRR212570
Tamabotan	O	NA	NA	NA	NA	37.2881	8.19209	NA	NA	DRR212526
Tanfun	O	65.1515	21.2121	NA	NA	23.8095	7.14286	NA	NA	DRR212527
Tenjin	F	50	18.75	51	12.3333	98	62.6667	78.0488	32.9268	DRR212475
Toji	O	NA	NA	NA	NA	0	0	NA	NA	DRR212528
Tojikobai	F	76	16.3333	10	2.33333	73	26.6667	NA	NA	DRR212476
Toyadenotaka	O	0	0	NA	NA	0	0	NA	NA	DRR212529
Tsukushiko	O	NA	NA	NA	NA	10.5263	1.75439	NA	NA	DRR212530
Unryu	O	NA	NA	NA	NA	61.1111	21.7593	NA	NA	DRR212531
Utsushiroyama	O	NA	NA	NA	NA	0	0	NA	NA	DRR212533
W2	F	92.0792	38.7789	89	35.1667	NA	NA	NA	NA	DRR465149
Yaetoji	O	NA	NA	0	0	86	47.8333	NA	NA	DRR212534
Yakushi	F	49	19.3333	7	1.66667	56	17.8333	NA	NA	DRR212478
Yanagawashibori	O	0	0	2	0.333333	2	0.333333	0	0	DRR212535
Yogo1	F	13.8462	3.33333	0	0	7	1.33333	NA	NA	DRR212479
Yosei	F	3	0.5	1	0.166667	0	0	0	0	DRR212480
Zaronbai	F	2.94118	0.490196	2	0.5	18	3.66667	NA	NA	DRR212481
a F: Fruit accessions, FS: Small-fruit accessions, O: Ornamental accessions, T: Taiwanese accessions, AM: accessions derived from P. mume × P. armeniaca,
SM: accessions derived from P. mume × P. salicina.
b SRA run accession numbers for raw fastq sequences of each accession.

## Sheet: Table S2
Table S2. Significant GWAS peaks (FDR < 0.1)a for Rt in 2017.
Trait	Chromosome	Pos	-log10P
Rt2017	1	28448954	4.38405
Rt2017	2	17899184	3.99568
Rt2017	2	17996016	4.17522
Rt2017	2	18159465	4.17522
Rt2017	2	20765244	4.01818
Rt2017	2	23000599	5.15366
Rt2017	3	25848635	4.44733
Rt2017	5	3464604	4.11464
Rt2017	5	15041135	5.28819
Rt2017	6	6442028	3.97469
Rt2017	6	6442137	3.97469
Rt2017	6	17195508	4.47625
Rt2017	6	17406298	4.65561
Rt2017	6	17415037	4.65561
Rt2017	6	17492260	4.49485
Rt2017	6	17549315	4.49485
Rt2017	6	17768010	4.67985
Rt2017	6	17771326	4.60033
Rt2017	6	17771440	4.67985
Rt2017	6	17771496	4.32975
Rt2017	6	17771501	4.32975
Rt2017	6	17966849	4.40121
Rt2017	6	17966890	4.40121
Rt2017	6	18230070	4.26841
Rt2017	6	18363707	4.284
Rt2017	7	452914	4.3019
Rt2017	7	452935	4.29671
Rt2017	7	452976	4.3019
Rt2017	7	453015	4.45593
Rt2017	7	453045	4.44249
Rt2017	7	17776285	4.23882
Rt2017	7	17776453	4.23882
Rt2017	7	17776481	4.23882
Rt2017	8	19895234	5.33724
Rt2017	8	19956845	5.33724
Rt2017	8	20009405	5.33724
Rt2017	8	20095763	5.33724
Rt2017	8	20311602	4.05404
Rt2017	8	20392183	4.34775
Rt2017	8	20396172	4.34775
Rt2017	8	20396173	4.34775
Rt2017	8	20404023	4.19518
a Significant peaks detected in multiple years for disease severity index (Sv) are colored in yellow.

## Sheet: Table S3
Table S3. Significant GWAS peaks (FDR < 0.1)a for Sv in 2017.
Trait	Chromosome	Pos	-log10P
Sv2017	1	9065649	3.82391
Sv2017	1	10714049	4.47756
Sv2017	1	10714353	4.47756
Sv2017	1	10800694	4.44009
Sv2017	1	10800709	4.44009
Sv2017	1	11096087	4.43063
Sv2017	1	11096095	4.43063
Sv2017	1	11096108	4.47756
Sv2017	1	11108294	4.47756
Sv2017	1	11109973	4.47756
Sv2017	1	23567703	4.24642
Sv2017	1	23967541	6.34486
Sv2017	1	27350042	4.36351
Sv2017	1	27362524	4.34582
Sv2017	1	28100634	4.48945
Sv2017	1	28100841	4.4908
Sv2017	1	28107182	4.48945
Sv2017	1	28443684	4.50864
Sv2017	1	28448688	4.50864
Sv2017	1	28448696	4.50864
Sv2017	1	28448932	4.50864
Sv2017	1	28448954	5.11182
Sv2017	1	28460048	4.48545
Sv2017	1	28460188	4.47625
Sv2017	2	4120518	4.27327
Sv2017	2	6640657	3.94692
Sv2017	2	17866373	6.49757
Sv2017	2	17899184	6.72354
Sv2017	2	17902254	6.41454
Sv2017	2	17996016	6.82102
Sv2017	2	18072078	3.91009
Sv2017	2	18072087	3.91009
Sv2017	2	18159465	6.82102
Sv2017	2	19645472	3.98297
Sv2017	2	19658058	4.03339
Sv2017	2	19791377	3.7986
Sv2017	2	20765244	7.15989
Sv2017	2	23000599	5.00261
Sv2017	2	23703163	3.73518
Sv2017	3	21816278	6.42481
Sv2017	3	22158771	3.70997
Sv2017	3	25527982	3.65956
Sv2017	3	25848635	3.95468
Sv2017	5	3464604	4.54516
Sv2017	5	11940711	4.34199
Sv2017	5	11940795	4.34199
Sv2017	5	11940803	4.34199
Sv2017	5	11940823	4.34199
Sv2017	5	15041135	5.31785
Sv2017	5	17957621	3.88941
Sv2017	6	5300628	4.04672
Sv2017	6	6095818	4.00087
Sv2017	6	6400303	6.69465
Sv2017	6	6400451	6.69465
Sv2017	6	6442010	6.60906
Sv2017	6	6442028	6.77989
Sv2017	6	6442137	6.77989
Sv2017	6	16958017	6.62709
Sv2017	6	17195328	3.61979
Sv2017	6	17195508	6.97881
Sv2017	6	17406298	7.07007
Sv2017	6	17415037	7.07007
Sv2017	6	17492094	4.0942
Sv2017	6	17492260	7.01909
Sv2017	6	17549315	7.01909
Sv2017	6	17768010	7.1707
Sv2017	6	17771326	7.03527
Sv2017	6	17771440	7.1707
Sv2017	6	17771496	6.97881
Sv2017	6	17771501	6.97881
Sv2017	6	17966849	7.0278
Sv2017	6	17966890	7.0278
Sv2017	6	18230070	6.95468
Sv2017	6	18363707	6.92445
Sv2017	7	452914	3.93554
Sv2017	7	452935	3.93554
Sv2017	7	452976	3.93554
Sv2017	7	453015	3.83268
Sv2017	7	453045	3.82974
Sv2017	7	17776285	4.03105
Sv2017	7	17776453	4.03105
Sv2017	7	17776481	4.03105
Sv2017	8	325461	4.45717
Sv2017	8	5750721	3.95861
Sv2017	8	5858478	3.95861
Sv2017	8	6475415	3.96257
Sv2017	8	14751456	3.76955
Sv2017	8	14751462	3.76955
Sv2017	8	16312021	3.66354
Sv2017	8	19856573	3.92445
Sv2017	8	19895234	5.21254
Sv2017	8	19956845	5.21254
Sv2017	8	20009405	5.21254
Sv2017	8	20095763	5.21254
Sv2017	8	20311602	3.67985
Sv2017	8	20392183	3.97881
Sv2017	8	20396172	3.97881
Sv2017	8	20396173	3.97881
a Significant peaks detected in multiple years are colored in yellow.

## Sheet: Table S4
Table S4. Significant GWAS peaks (FDR < 0.1)a for Sv in 2018.
Trait	Chromosome	Pos	-log10P
Sv2018	1	8145389	4.57349
Sv2018	1	17415002	5.98716
Sv2018	2	23000599	4.83863
Sv2018	3	1039798	4.20971
Sv2018	3	1049958	4.20971
Sv2018	5	8245884	4.61798
Sv2018	5	8245891	4.39686
Sv2018	6	20191771	4.28567
Sv2018	8	19895234	4.90658
Sv2018	8	19956845	4.90658
Sv2018	8	20009405	6.11805
Sv2018	8	20095763	6.11805
Sv2018	8	20311602	4.42136
Sv2018	8	20392183	5.69897
Sv2018	8	20396172	5.69897
Sv2018	8	20396173	5.69897
Sv2018	8	20404023	4.39254
Sv2018	8	20589478	5.61083
Sv2018	8	20589758	5.61261
Sv2018	8	20959559	5.63827
Sv2018	8	20974480	5.62893
Sv2018	8	20987332	5.63827
Sv2018	8	21013134	5.6216
Sv2018	8	21013159	5.6216
Sv2018	8	21051015	5.69037
Sv2018	8	21051020	5.69037
Sv2018	8	21051107	5.72125
a Significant peaks detected in multiple years are colored in yellow.

## Sheet: Table S5
Table S5. Rt, Sv, and genotypesa at nine significant GWAS peaks detected in multiple years.
		Trait								Chr.2	Chr. 8
Group	Accession	Rt2016	Rt2017	Rt2018	Rt2019	Sv2016	Sv2017	Sv2018	Sv2019	23000599	19895234	19956845	20009405	20095763	20311602	20392183	20396172	20396173
F	W2	92.0792	89	NA	NA	38.7789	35.1667	NA	NA	T	R	W	Y	S	C	T	G	C
F	Tenjin	50	51	98	78.0488	18.75	12.3333	62.6667	32.9268	T	R	W	Y	S	C	T	G	C
F	Kotsubunanko	52.5253	51	93	63	17.3401	13.1667	52.8333	16	T	R	W	Y	S	C	T	G	C
F	Benisashi	51	33	54	72.7273	16.1667	6.33333	14.1667	22.7273	T	A	T	C	G	Y	G	A	T
AM	Bungo	0	6	15	13	0	1.5	2.83333	1.66667	T	A	T	C	G	Y	G	A	T
F	Seiko	47	46	NA	NA	16.6667	10.5	NA	NA	W	A	T	C	G	C	T	G	C
F	Nanko	70	62	92.9293	85	18.8333	16.1667	50.8418	34.6667	W	R	W	Y	S	C	T	G	C
F	Sadayuume	57	27	80	62	17.1667	5	30.5	22.3333	W	R	W	Y	S	C	T	G	C
F	Tojikobai	76	10	73	NA	16.3333	2.33333	26.6667	NA	W	A	T	C	G	C	T	G	C
O	Tanfun	65.1515	NA	23.8095	NA	21.2121	NA	7.14286	NA	W	R	W	Y	S	C	T	G	C
F	Seishu	13	34	NA	NA	2.33333	7.33333	NA	NA	W	A	T	C	G	Y	K	R	Y
FS	Shinanokoume	0	NA	NA	NA	0	NA	NA	NA	W	A	T	C	G	Y	G	A	T
FS	OK1	0	0	NA	NA	0	0	NA	NA	W	A	T	C	G	Y	G	A	T
O	Yaetoji	NA	0	86	NA	NA	0	47.8333	NA	W	A	T	C	G	Y	K	R	Y
AM	Inabungo	NA	NA	81.25	76	NA	NA	45.3125	28.6667	W	A	T	C	G	Y	G	A	T
F	Jakobai	NA	NA	65	NA	NA	NA	24.6667	NA	W	A	T	C	G	Y	K	R	Y
O	Unryu	NA	NA	61.1111	NA	NA	NA	21.7593	NA	W	A	T	C	G	Y	K	R	Y
F	Fudono	14.2857	0	58	53.8462	2.38095	0	19.3333	10.8974	W	A	T	C	G	Y	K	R	Y
F	Jizoume	41	26	60	39	7.66667	5.5	17.1667	6.66667	W	A	T	C	G	Y	K	R	Y
O	Chinamume	6.89655	0	46	NA	1.43678	0	13.3333	NA	W	A	T	C	G	Y	K	R	Y
AM	Jumbotakada	NA	0	54	NA	NA	0	10	NA	W	A	T	C	G	Y	G	A	T
O	Tamabotan	NA	NA	37.2881	NA	NA	NA	8.19209	NA	W	A	T	C	G	Y	K	R	Y
O	Okinaume	NA	0	22	11	NA	0	7.83333	1.33333	W	A	T	C	G	Y	G	A	T
O	Sabashiko	NA	NA	25	NA	NA	NA	7.29167	NA	W	A	T	C	G	Y	K	R	Y
AM	Fushida	20	7.14286	18	NA	4.16667	1.19048	5	NA	W	A	T	C	G	Y	G	A	T
O	Kinko	2.22222	0	15	NA	0.555556	0	3	NA	W	A	T	C	G	Y	G	A	T
O	Benichidori	51.4851	NA	8.75	23	13.8614	NA	2.08333	4.5	W	A	T	C	G	Y	K	R	Y
O	Osakazuki	NA	NA	10	0	NA	NA	1.83333	0	W	A	T	C	G	Y	G	A	T
F	Hachiro	11.4286	6	10	0	4.04762	1	1.83333	0	W	A	T	C	G	Y	K	R	Y
F	Fukuju	13.0435	0	11	NA	2.89855	0	1.83333	NA	W	A	T	C	G	Y	G	A	T
AM	Taihei	2.35294	3	8	NA	0.392157	0.666667	1.83333	NA	W	A	T	C	G	Y	G	A	T
O	Tsukushiko	NA	NA	10.5263	NA	NA	NA	1.75439	NA	W	A	T	C	G	Y	K	R	Y
F	Kagajizo	18	2	9	3.75	8.5	0.5	1.5	0.416667	W	A	T	C	G	Y	G	A	T
F	Oshuku	2	0	9	0	0.333333	0	1.5	0	W	A	T	C	G	Y	G	A	T
AM	Seiyobai	0	0	9	1	0	0	1.5	0.166667	W	A	T	C	G	Y	K	R	Y
F	Gojiro	25.9259	0	8	2.46914	6.17284	0	1.33333	0.411523	W	A	T	C	G	Y	G	A	T
F	Yogo1	13.8462	0	7	NA	3.33333	0	1.33333	NA	W	A	T	C	G	Y	G	A	T
F	Okunoume	0	0	8	NA	0	0	1.33333	NA	W	A	T	C	G	Y	G	A	T
F	Shirokaga	50	0	7	NA	14.6667	0	1.16667	NA	W	A	T	C	G	Y	G	A	T
O	Gofukushidare	45.4545	NA	4	0	11.3636	NA	1.16667	0	W	A	T	C	G	Y	G	A	T
F	Gyokuei	21	0	6	0	5.5	0	1.16667	0	W	A	T	C	G	Y	G	A	T
O	Ikuyonezame	NA	NA	5.33333	NA	NA	NA	0.888889	NA	W	A	T	C	G	Y	G	A	T
F	Rinshu-Fukui	0	0	5	NA	0	0	0.833333	NA	W	A	T	C	G	Y	G	A	T
F	Hanakami	NA	NA	2	NA	NA	NA	0.333333	NA	W	A	T	C	G	Y	K	R	Y
F	Rinshu-Nara	NA	NA	1	NA	NA	NA	0.166667	NA	W	A	T	C	G	Y	K	R	Y
O	Asahitaki	NA	NA	0	6.06061	NA	NA	0	2.52525	W	A	T	C	G	Y	G	A	T
O	Chasenbai	NA	NA	0	NA	NA	NA	0	NA	W	A	T	C	G	Y	G	A	T
O	Toji	NA	NA	0	NA	NA	NA	0	NA	W	A	T	C	G	Y	G	A	T
F	Garyubai	NA	0	0	0	NA	0	0	0	W	A	T	C	G	Y	G	A	T
O	Goshoko	NA	0	0	NA	NA	0	0	NA	W	A	T	C	G	Y	G	A	T
SM	PM1-1	NA	0	0	NA	NA	0	0	NA	W	A	T	C	G	Y	G	A	T
F	Misato1	32.6923	0	0	NA	15.0641	0	0	NA	W	A	T	C	G	Y	G	A	T
O	Mera	3	0	0	NA	0.5	0	0	NA	W	A	T	C	G	Y	G	A	T
O	Gekkyuden	0	0	0	5.55556	0	0	0	0.925926	W	A	T	C	G	Y	K	R	Y
F	Kahoku	0	0	0	NA	0	0	0	NA	W	A	T	C	G	Y	G	A	T
FS	Kinugasa	0	0	0	NA	0	0	0	NA	W	A	T	C	G	C	K	R	Y
FS	Koyokoume	0	0	0	NA	0	0	0	NA	W	A	T	C	G	Y	G	A	T
F	JO1028-6	52	51	NA	NA	16.6667	15.8333	NA	NA	A	A	T	C	G	Y	G	A	T
SM	Sumomoume	3	0	81.8182	87	0.5	0	29.4372	21.3333	A	A	T	C	G	Y	G	A	T
FS	Ryukyokoume	50	18.1818	66	NA	12.5	3.78788	20	NA	A	R	W	Y	S	Y	G	A	T
F	Yakushi	49	7	56	NA	19.3333	1.66667	17.8333	NA	A	A	T	C	G	Y	K	R	Y
T	Ellching	54.5455	61	51	60	10.6061	15.8333	17.5	17.6667	A	A	T	C	G	Y	G	A	T
F	Kinotakara	1	1.92308	44	NA	0.166667	0.641026	16.3333	NA	A	A	T	C	G	Y	K	R	Y
F	Shiratama	30.2326	10	53	NA	8.52713	2.16667	13.1667	NA	A	A	T	C	G	Y	G	A	T
F	Ankoyabai	0	0	35	25.3165	0	0	7.83333	6.54008	A	A	T	C	G	Y	K	R	Y
O	Morinoseki	46.6667	4.7619	19	7.04225	10.5556	0.793651	4.83333	1.64319	A	A	T	C	G	Y	K	R	Y
F	Zaronbai	2.94118	2	18	NA	0.490196	0.5	3.66667	NA	A	A	T	C	G	Y	G	A	T
O	Seiryushidare	0	0	20	0	0	0	3.5	0	A	A	T	C	G	Y	G	A	T
O	Hasegawashibori	NA	NA	20	NA	NA	NA	3.33333	NA	A	A	T	C	G	Y	G	A	T
O	Kanbaishidare	8.92857	NA	20	12.6761	1.4881	NA	3.33333	3.05164	A	A	T	C	G	Y	K	R	Y
T	ST	0	10	9	5	0	1.66667	2.16667	1	A	A	T	C	G	Y	G	A	Y
T	Hakufunbai	14.2857	13.253	6	5	2.72109	2.81124	2	0.666667	A	A	T	C	G	Y	G	A	T
T	85486	6.89655	0	11.1111	0	1.14943	0	1.85185	0	A	A	T	C	G	Y	G	A	T
F	Shisen	60	0	11	NA	23.3333	0	1.83333	NA	A	A	T	C	G	Y	G	A	T
F	Kaidarewase	1	2	8	NA	0.166667	0.333333	1.83333	NA	A	A	T	C	G	Y	K	R	Y
F	Kairyouchida	2	0	10	NA	0.333333	0	1.66667	NA	A	A	T	C	G	Y	K	R	Y
O	Shinheike	0	0	9	0	0	0	1.66667	0	A	A	T	C	G	Y	K	R	Y
O	Akebono	0	0	6	NA	0	0	1	NA	A	A	T	C	G	Y	G	A	T
O	Tagonotsuki	NA	0	5.76923	0	NA	0	0.961538	0	A	A	T	C	G	Y	G	A	T
F	Ozaki	0	0	5	NA	0	0	0.833333	NA	A	A	T	C	G	Y	G	A	T
F	Kodama	2.63158	0	4	0	0.438596	0	0.666667	0	A	A	T	C	G	Y	K	R	Y
O	Meotoshidare	NA	NA	3	NA	NA	NA	0.5	NA	A	A	T	C	G	Y	G	A	T
F	Aojiku	0	0	2	NA	0	0	0.5	NA	A	A	T	C	G	Y	G	A	T
F	Kushino	0	0	3	0	0	0	0.5	0	A	A	T	C	G	Y	G	A	T
T	Taiwan	NA	0	2	0	NA	0	0.333333	0	A	A	T	C	G	Y	G	A	T
O	Kanseishidare	4	0	2	0	0.666667	0	0.333333	0	A	A	T	C	G	Y	G	A	T
F	Sakamoto	0	2	2	0	0	0.333333	0.333333	0	A	A	T	C	G	Y	G	A	T
O	Yanagawashibori	0	2	2	0	0	0.333333	0.333333	0	A	A	T	C	G	Y	G	A	T
O	Mangetsushidare	0	0	2	NA	0	0	0.333333	NA	A	A	T	C	G	Y	G	A	T
F	Juro	0	0	1	NA	0	0	0.166667	NA	A	A	T	C	G	Y	G	A	T
O	Omoinomama	NA	NA	0	NA	NA	NA	0	NA	A	A	T	C	G	Y	G	A	T
AM	Rinshibai	NA	NA	0	NA	NA	NA	0	NA	A	A	T	C	G	C	K	R	Y
O	Utsushiroyama	NA	NA	0	NA	NA	NA	0	NA	A	A	T	C	G	Y	G	A	T
AM	Kanshikobai	NA	0	0	0	NA	0	0	0	A	A	T	C	G	C	K	R	Y
F	Kinyuji	NA	0	0	NA	NA	0	0	NA	A	A	T	C	G	Y	K	R	Y
F	Naniwa	NA	0	0	NA	NA	0	0	NA	A	A	T	C	G	Y	K	R	Y
FS	Purplequeen	NA	0	0	NA	NA	0	0	NA	A	A	T	C	G	Y	K	R	Y
O	Michishirube	24.5455	NA	0	0	6.81818	NA	0	0	A	A	T	C	G	Y	G	A	T
FS	Hakuo	3	2	0	NA	0.5	0.333333	0	NA	A	A	T	C	G	Y	K	R	Y
F	Yosei	3	1	0	0	0.5	0.166667	0	0	A	A	T	C	G	Y	G	A	T
FS	Benio	2	0	0	NA	0.333333	0	0	NA	A	A	T	C	G	C	G	A	T
FS	Koshusaisho	1	0	0	NA	0.333333	0	0	NA	A	A	T	C	G	Y	K	R	Y
FS	Maezawakoume	1	0	0	NA	0.166667	0	0	NA	A	A	T	C	G	Y	G	A	T
O	Hitoeryokugaku	0	NA	0	NA	0	NA	0	NA	A	A	T	C	G	Y	G	A	T
O	Toyadenotaka	0	NA	0	NA	0	NA	0	NA	A	R	W	C	G	Y	G	A	T
F	Kensaki	0	0	0	0	0	0	0	0	A	A	T	C	G	Y	G	A	T
FS	Orihime	0	0	0	NA	0	0	0	NA	A	A	T	C	G	Y	G	A	T
O	Suishinbai	0	0	0	0	0	0	0	0	A	A	T	C	G	Y	K	R	Y
a Genotypes: A, T, C and G: Homozygote for each base.
K, R, S, W and Y: Heterozygote of A/T, A/G, C/G, A/T and C/T, respectively.
