# Supplementary material for: Genome-Wide Association Study Detects Loci Involved in Scab Susceptibility in Japanese Apricot
Source: MDPI journal article supplement (doi:10.3390/horticulturae9080872), 2023-07-31
Supplement: s1 [file s1 › horticulturae-2514582-supplementary.pdf]

**(a) Ratio of diseased fruits (Rt; %)**

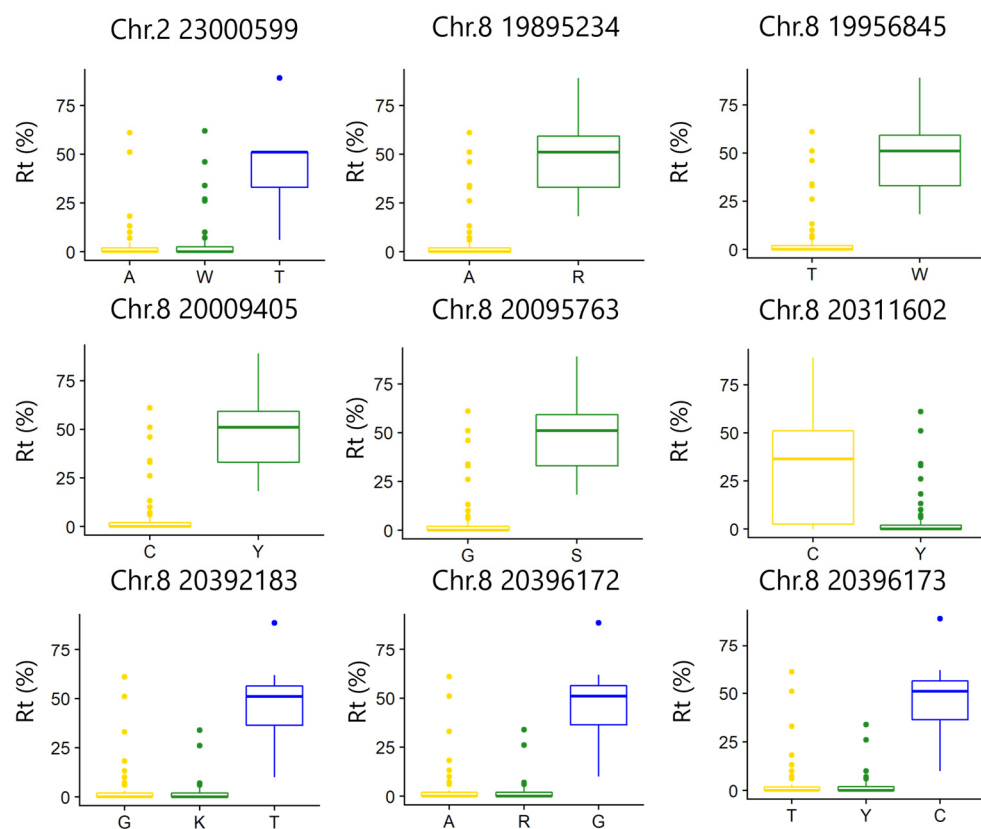

**(b) Disease severity index (Sv)**

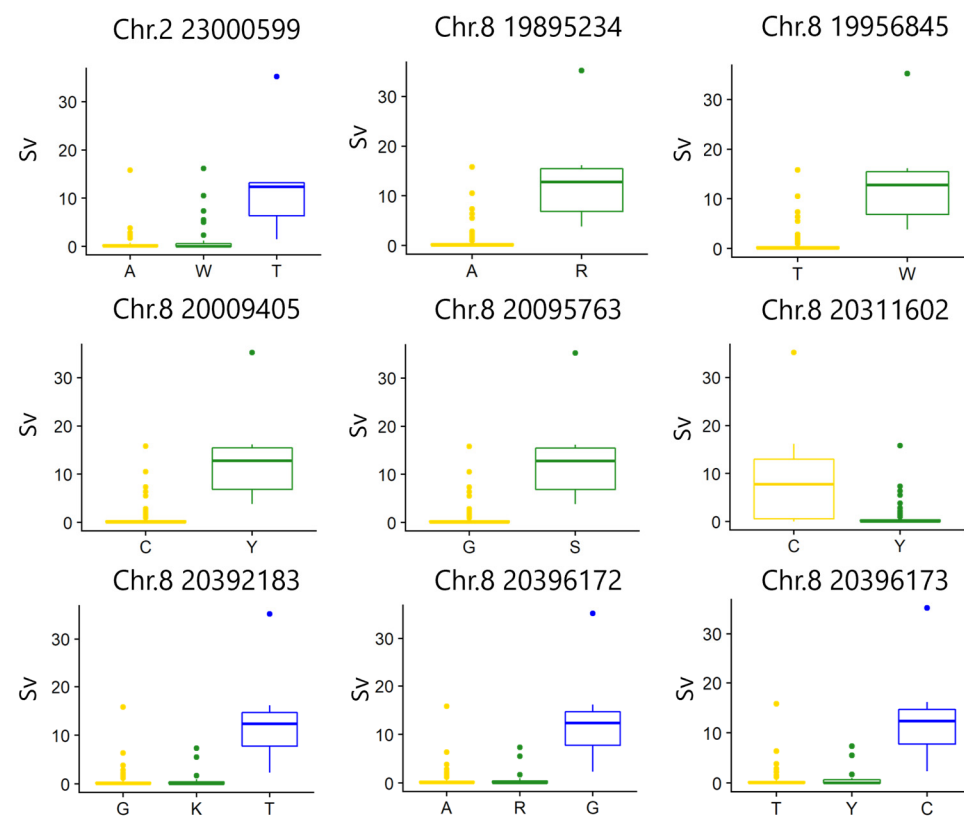

**Figure S1.** Box plots of trait values in 2017 for genotypes at nine SNPs detected in multiple years in GWAS. **(a)** Ratio of diseased fruits (Rt; %). **(b)** Disease severity index (Sv). Genotypes: A, T, C and G: Homozygote for each base. K, R, S, W and Y: Heterozygote of A/T, A/G, C/G, A/T and C/T, respectively.

**(a) Ratio of diseased fruits (Rt; %)**

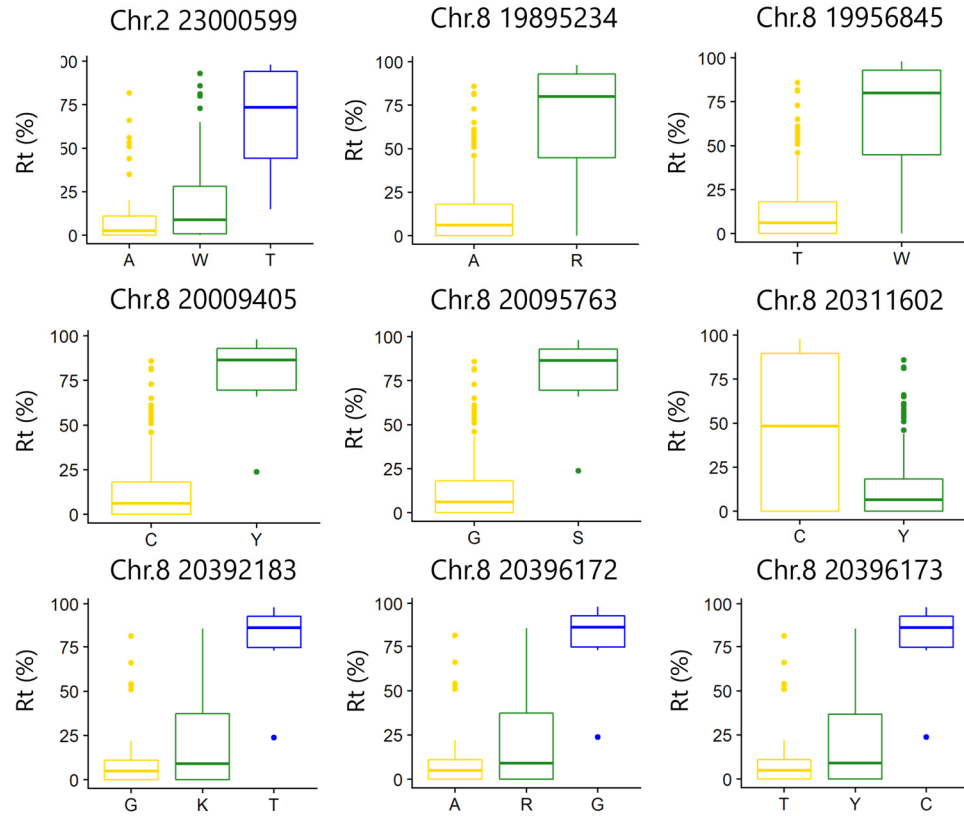

**(b) Disease severity index (Sv)**

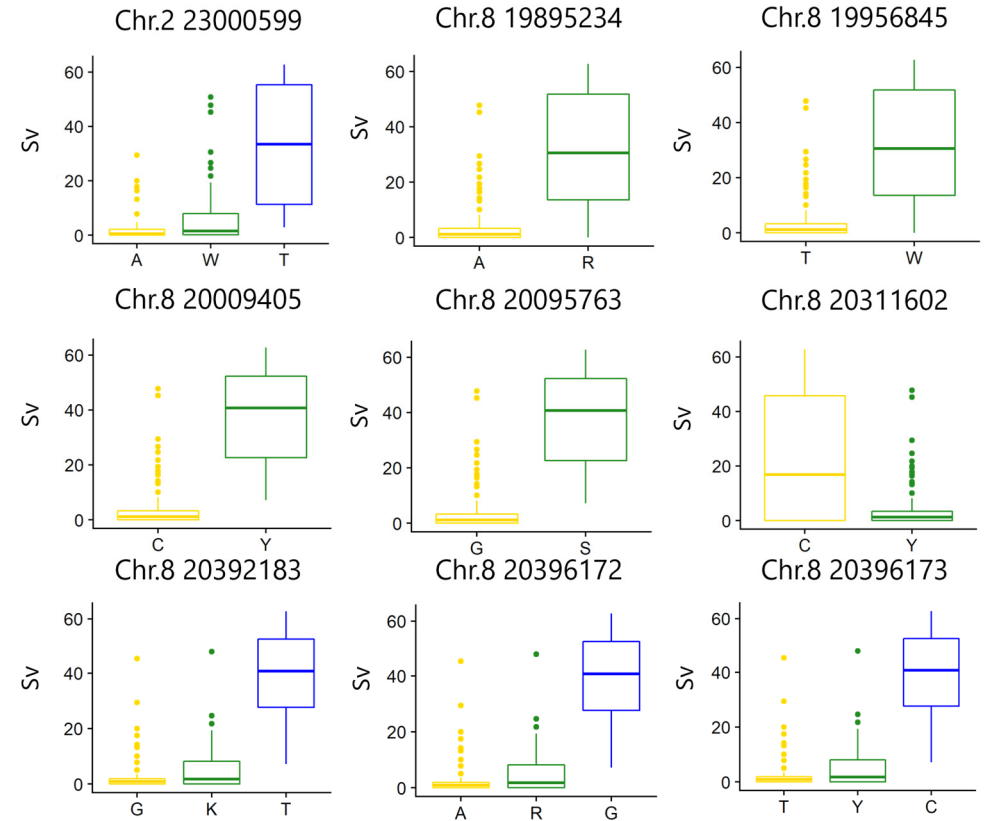

**Figure S2.** Box plots of trait values in 2018 for genotypes at nine SNPs detected in multiple years in GWAS. **(a)** Ratio of diseased fruits (Rt; %). **(b)** Disease severity index (Sv). Genotypes: A, T, C and G: Homozygote for each base. K, R, S, W and Y: Heterozygote of A/T, A/G, C/G, A/T and C/T, respectively.

**(a) Ratio of diseased fruits (Rt; %)**

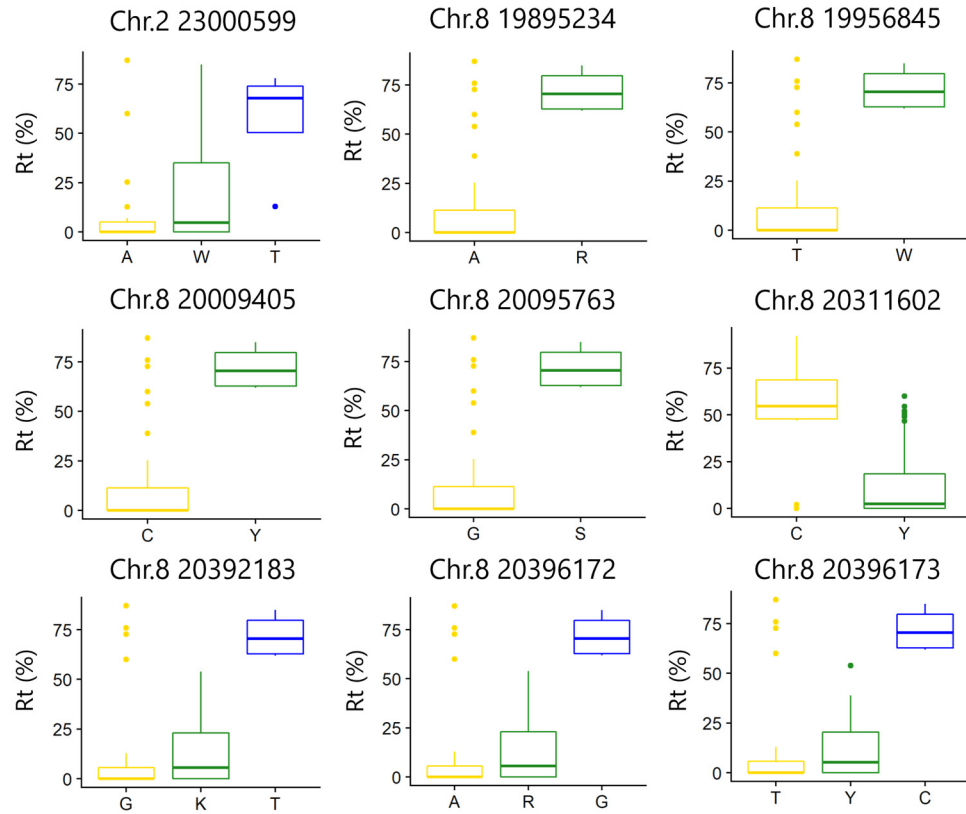

**(b) Disease severity index (Sv)**

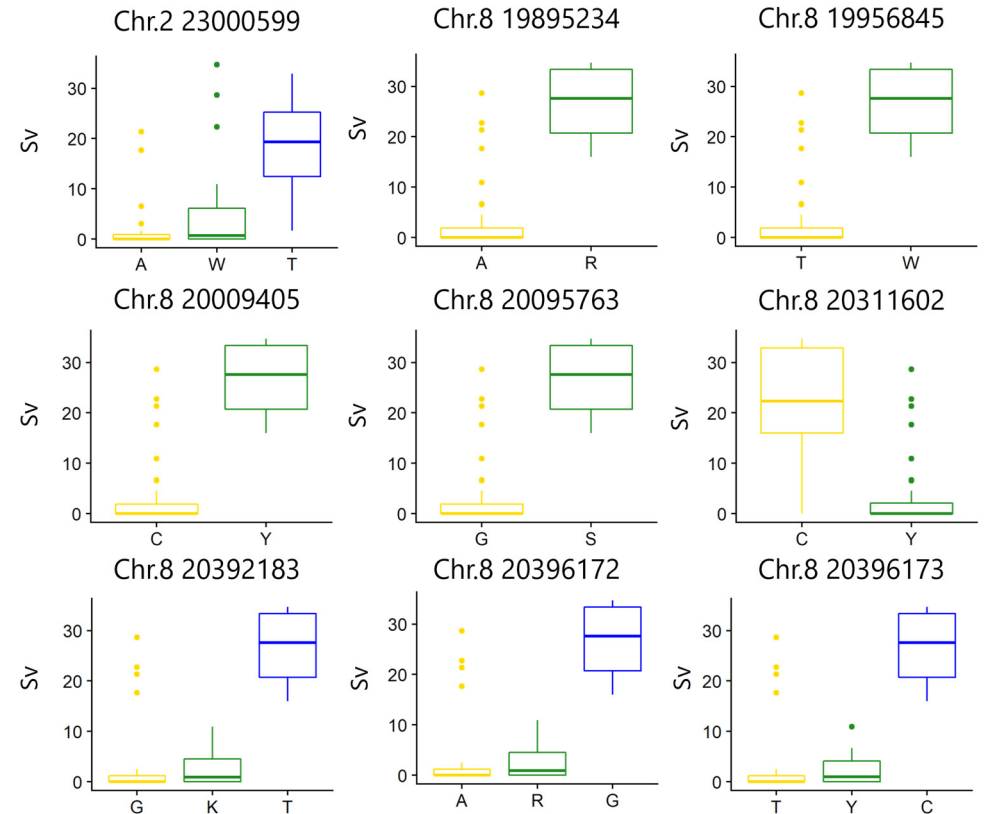

**Figure S3.** Box plots of trait values in 2019 for genotypes at nine SNPs detected in multiple years in GWAS. **(a)** Ratio of diseased fruits (Rt; %). **(b)** Disease severity index (Sv). Genotypes: A, T, C and G: Homozygote for each base. K, R, S, W and Y: Heterozygote of A/T, A/G, C/G, A/T and C/T, respectively.
